# Supplementary material for: Association of abstinence-induced alterations in working memory function and COMT genotype in smokers
Source: Springer Nature journal article supplement (doi:10.1007/s00213-013-3197-3), 2013-07-04
Supplement: MOESM1 [file 213_2013_3197_MOESM1_ESM.doc]

Association of abstinence-induced alterations in working memory function

and *COMT* genotype in smokers

*Psychopharmacology*

Rebecca L. Ashare, Ph.D.1*, Jeffrey N. Valdez, M.S.2, Kosha Ruparel, M.S.E. 2, Benjamin Albelda1, Ryan D. Hopson2, John R. Keefe2, James Loughead, Ph.D. 2, Caryn Lerman, Ph.D. 1

Author Affiliations:

1. Center for Interdisciplinary Research on Nicotine Addiction, Department of Psychiatry, University of Pennsylvania, Philadelphia, PA 19104
2. Brain Behavior Laboratory, Neuropsychiatry Department, Hospital of the University of Pennsylvania, Philadelphia, PA 19104

*Correspondence:

Rebecca L. Ashare, Ph.D.

Center for Interdisciplinary Research on Nicotine Addiction

3535 Market Street, Suite 4100

Philadelphia, PA 19104 USA

Tel: +1 (215) 746-5789

Fax: +1 (215) 746-7140

E-mail: rlashare@mail.med.upenn.edu

**Supplemental Table 1.** Session by Genotype Whole Brain Interaction

| Regiona | Cluster Size | HEMb | Z-MAXc | Xd | Y | Z |
| --- | --- | --- | --- | --- | --- | --- |
| Precuneus | 2610 | R | 7.91 | 21 | -59 | 36 |
| Insula | 290 | R | 6.82 | 29 | 26 | 16 |
| Fusiform Gyrus | 285 | R | 7.99 | 46 | -46 | -9 |
| Insula | 274 | L | 6.77 | -35 | 22 | 10 |
| Cuneus | 221 | L | 7.08 | -11 | -87 | 8 |
| Superior Temporal Gyrus | 211 | R | 6.47 | 50 | -40 | 17 |
| Cerebellum | 179 | L | 6.79 | -47 | -46 | -31 |
| Brainstem | 151 | R | 6.19 | 16 | -33 | -33 |
| Precentral Gyrus | 134 | L | 6.25 | -35 | -12 | 53 |
| Precuneus | 124 | R | 6.24 | 2 | -46 | 55 |
| Postcentral Gyrus | 118 | R | 6.47 | 20 | -31 | 56 |
| Cerbellum | 115 | L | 5.72 | -24 | -63 | -10 |
| Medial Frontal Gyrus | 105 | R | 6.47 | 12 | -2 | 52 |

aRegions exceeding whole-brain family-wise error (FWE) correction of p<0.05 (equivalent to z>4.69) and with more than 100 contiguous voxels; bHEM = cerebral hemisphere; cZ-MAX values represent peak activation for cluster; dEstimated coordinates for regions from Talairach and Tournoux (1988).


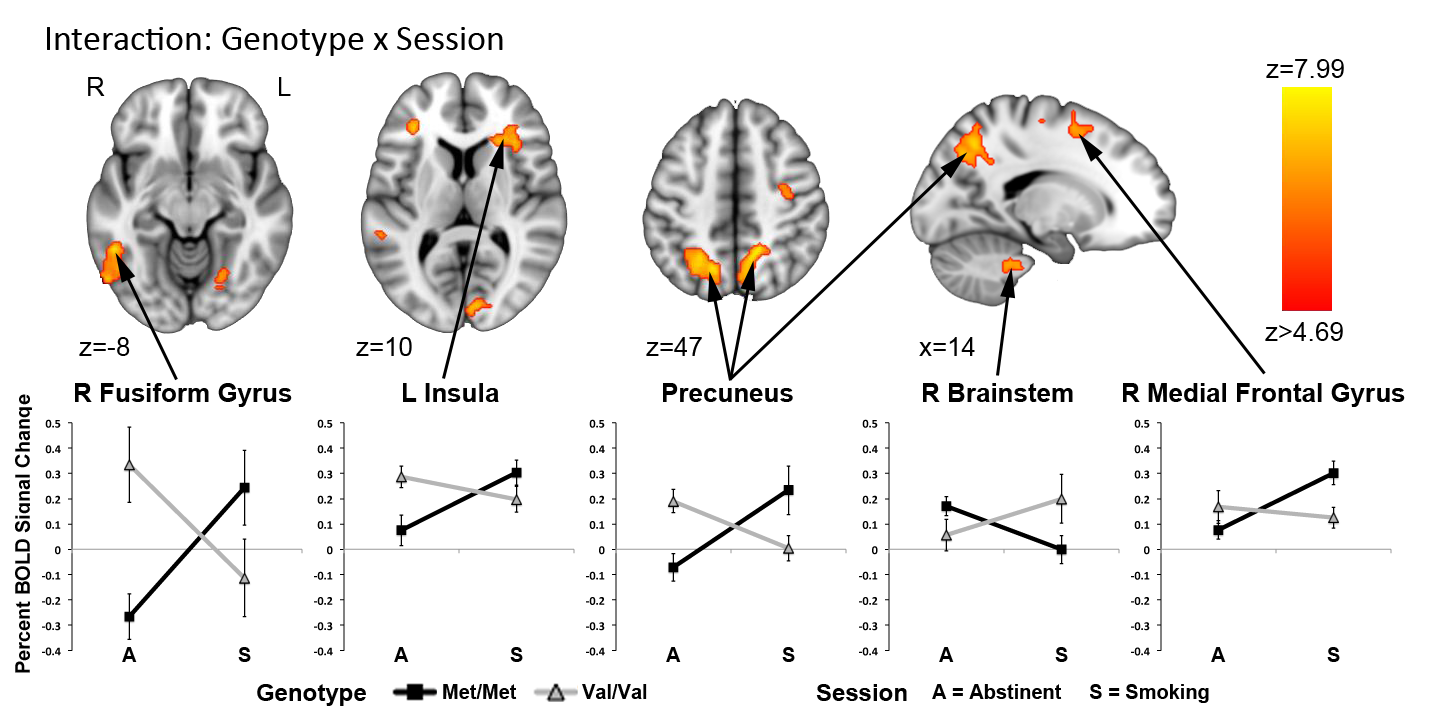
**Supplemental Figure 1.** Genotype x session interaction for the whole-brain voxel-wise analysis.

Mean percent BOLD signal change for the genotype by session interaction in clusters extracted from the whole-brain voxel-wise analysis. FWE corrected z ≥ 4.69, p < 0.05.
